# Supplementary material for: Thermodynamic regulation of CH3NH3PbI3crystal growth and its effect on photovoltaic performance of perovskite solar cells
Source: Royal Society of Chemistry journal article supplement (doi:10.1039/c5ta03990h), 2015-01-01
Supplement: c5ta03990h1.pdf [file c5ta03990h1.pdf]

## Supporting Information

### Thermodynamic Regulation of CH<sub>3</sub>NH<sub>3</sub>PbI<sub>3</sub> Crystal Growth and Its Effect on Photovoltaic Performance of Perovskite Solar Cell

Namyoung Ahn<sup>1†</sup>, Seong Min Kang<sup>1†</sup>, Jin-Wook Lee<sup>2</sup>, Mansoo Choi<sup>1,\*</sup>  
and Nam-Gyu Park<sup>2,\*</sup>

<sup>1</sup>Department of Mechanical and Aerospace Engineering, Seoul National University  
Seoul 151-742, Korea

<sup>2</sup>School of Chemical Engineering and Department of Energy Science  
Sungkyunkwan University, Suwon 440-746, Korea

#### Derive equation of thermodynamic MAPbI<sub>3</sub> reaction process.

From the relation (8) in the manuscript, we could derive a logarithmic formula by introducing constant  $C'$ .

$$\ln Y(\text{grain size}) = \frac{\hat{a} \dagger G_c}{3kT} + C'$$

Substituting equation (7), we could derive a formula about relationship between grain size and concentration.

$$\ln Y = \frac{1}{3kT} \frac{32}{\left(\frac{kT}{V_M} \ln \frac{C}{C_0}\right)^2} + C'$$

Finally, the equation could be obtained by replacing concentration  $C$  with  $X$ .

$$\ln Y = \frac{32j_{sl}^3}{3kT \left( \frac{kT}{V_m} (\ln X - \ln C_0(T)) \right)^2} + C'$$

Here, the equation was summarized as a simple formula with substitution other terms to constant, except for concentration.

$$\ln Y = \frac{B}{(\ln X - A)^2} + C$$

It would be assumed that the equilibrium concentration is 0.02 M of MAI solution at room temperature since the  $\text{PbI}_2$  film could not react with 0.02 M of MAI solution. In this manner, a value of A would be -3.19, which means natural log value of equilibrium constant. The other value of B and C were mathematically evaluated in order that the model was fitted with an actual data in Table S1, as result, B and C were 1.22 and 3.73 respectively (see Figure 3).

**Table S1.** Grain sizes, short-circuit photocurrent density ( $J_{sc}$ ), open-circuit voltage ( $V_{oc}$ ), fill factor (FF) and power conversion efficiency (PCE) versus  $\text{MAPbI}_3$  concentration. Data were taken from reference S1.

| MAI Concentration              | 0.038 M | 0.044 M | 0.050 M | 0.057 M | 0.063 M |
|--------------------------------|---------|---------|---------|---------|---------|
| Grain Size (nm)                | 720     | 360     | 190     | 130     | 90      |
| $J_{sc}$ (mA/cm <sup>2</sup> ) | 21.68   | -       | 21.01   | -       | 19.27   |
| $V_{oc}$ (V)                   | 1.065   | -       | 1.090   | -       | 1.080   |
| FF                             | 0.709   | -       | 0.711   | -       | 0.646   |
| PCE (%)                        | 16.36   | -       | 16.27   | -       | 13.45   |

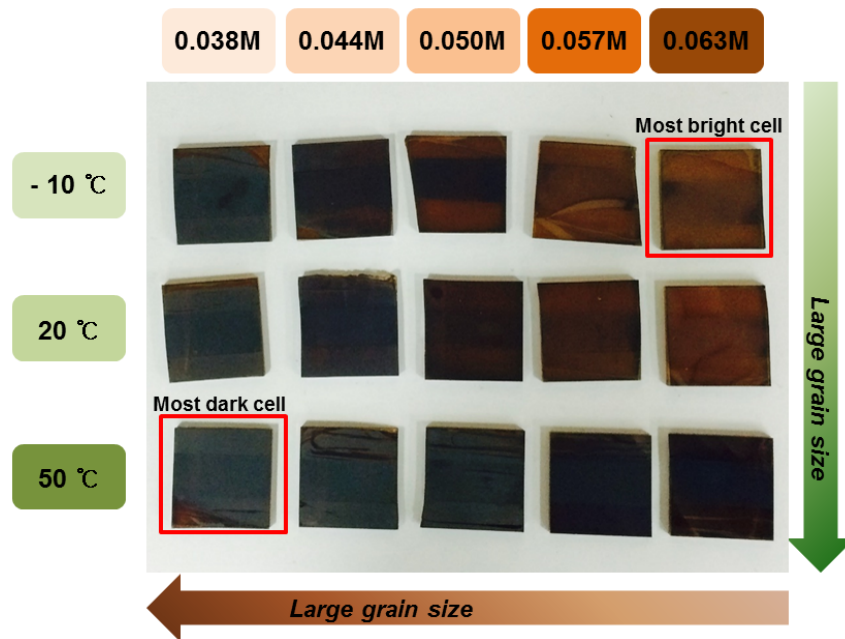

**Figure S1.** Photograph of MAPbI<sub>3</sub> coated substrates depending on MAI concentrations and reaction temperature.

#### References

S1. J.-H. Im, I.-H. Jang, N. Pellet, M. Grätzel and N.-G. Park, *Nat. Nanotechnol.*, 2014, **9**, 927-932.
